# Supplementary material for: rs41291957 controls miR‐143 and miR‐145 expression and impacts coronary artery disease risk
Source: PubMed Central journal article supplement (PMC8495461; doi:10.15252/emmm.202114060), 2021-09-22
Supplement: EMMM-13-e14060-s008.pdf [file EMMM-13-e14060-s008.pdf]

# Expanded View Figures

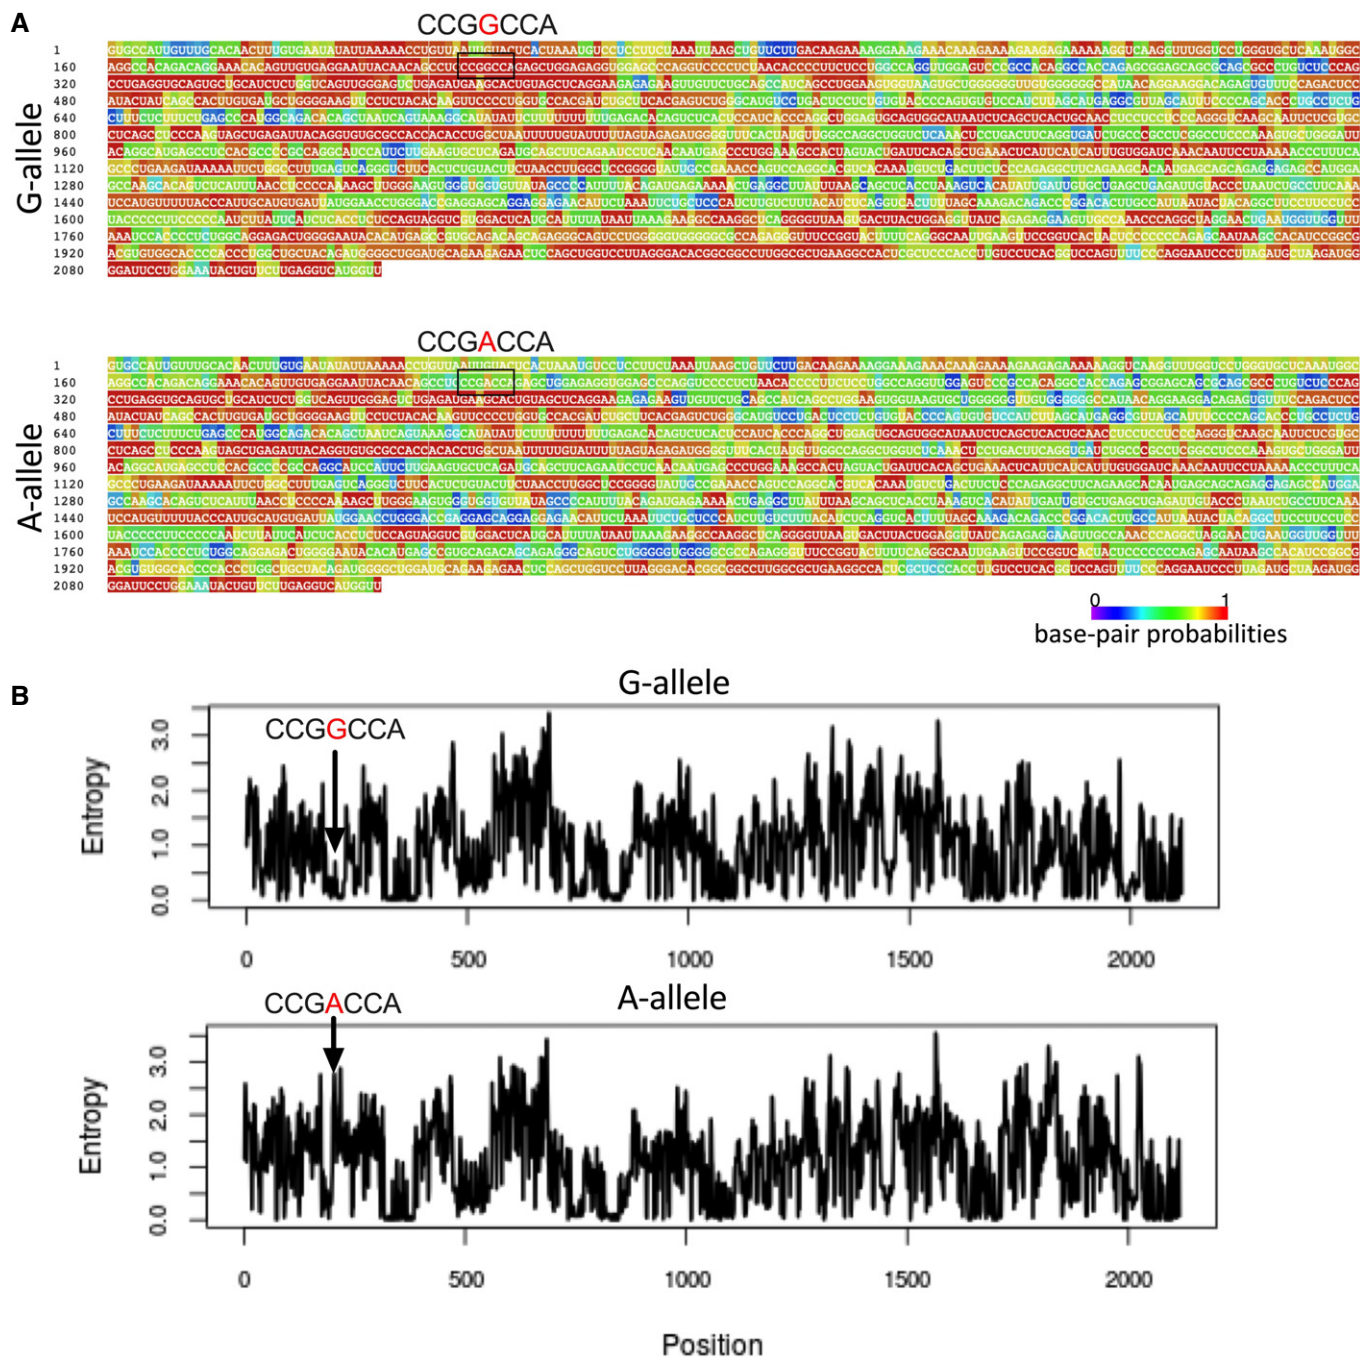

**Figure EV1. Thermodynamic analysis of the miR-143/145 primary sequence.**

A Base pair annealing probability using a centromeric prediction algorithm was carried out for the G- and A-allele sequences (the base in red indicates the variation).  
 B Entropy level profiles of the G- and A-allele transcripts.

## G-allele

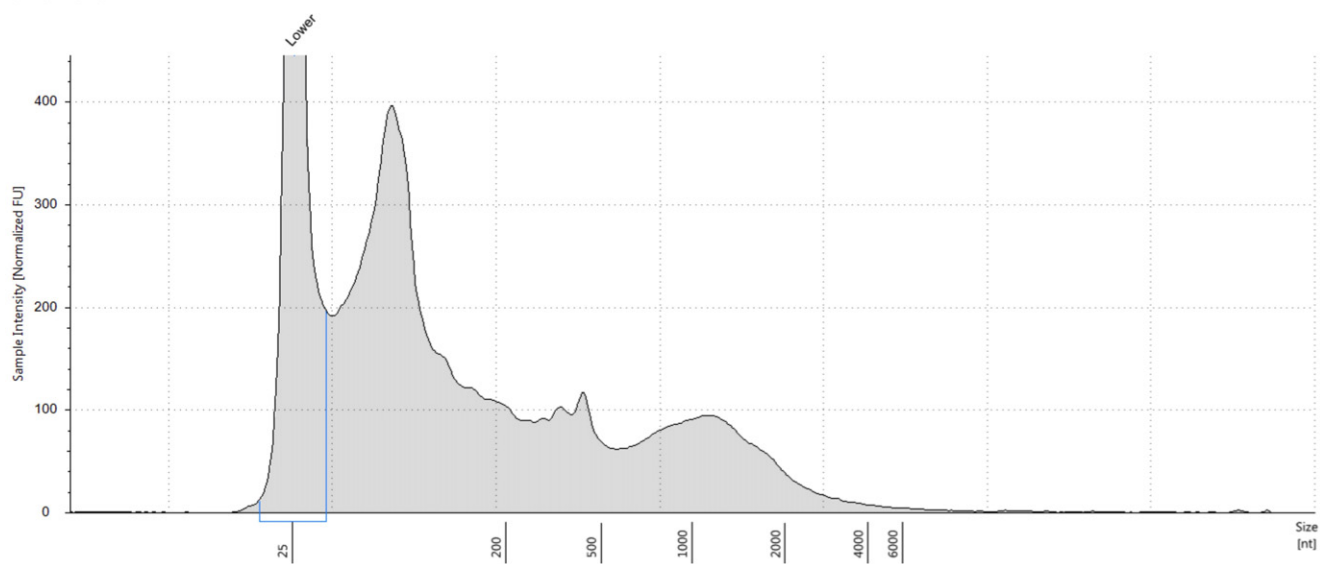

## A-allele

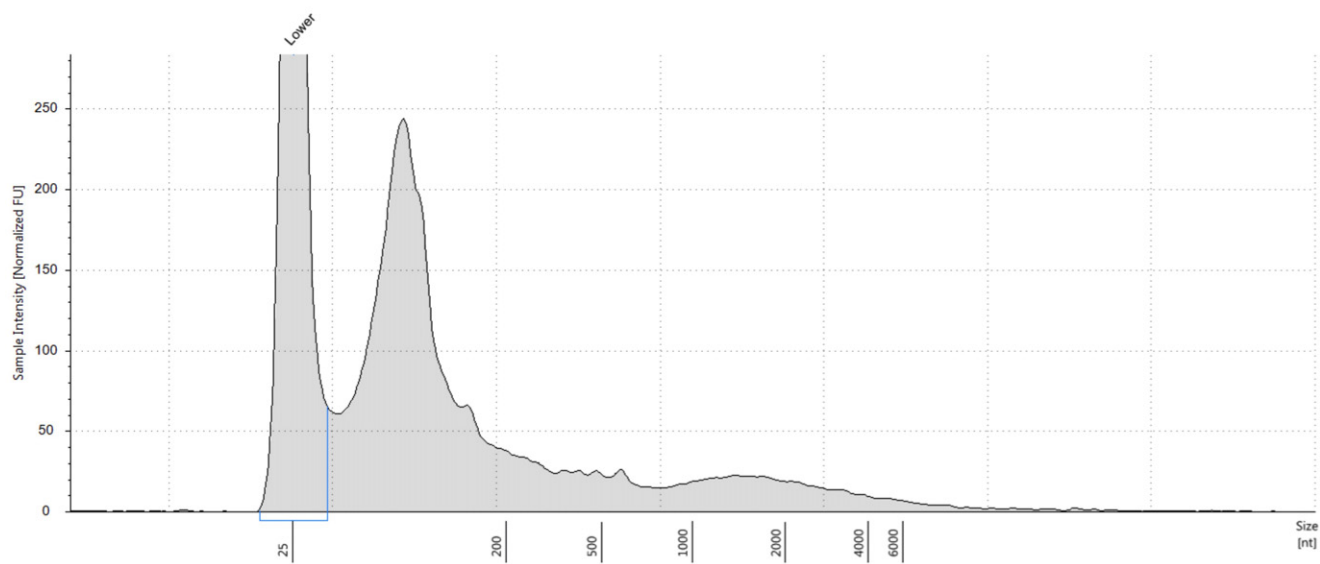

Figure EV2. TapeStation profiles of the G- and A-allele digested pri-miR-143/145.

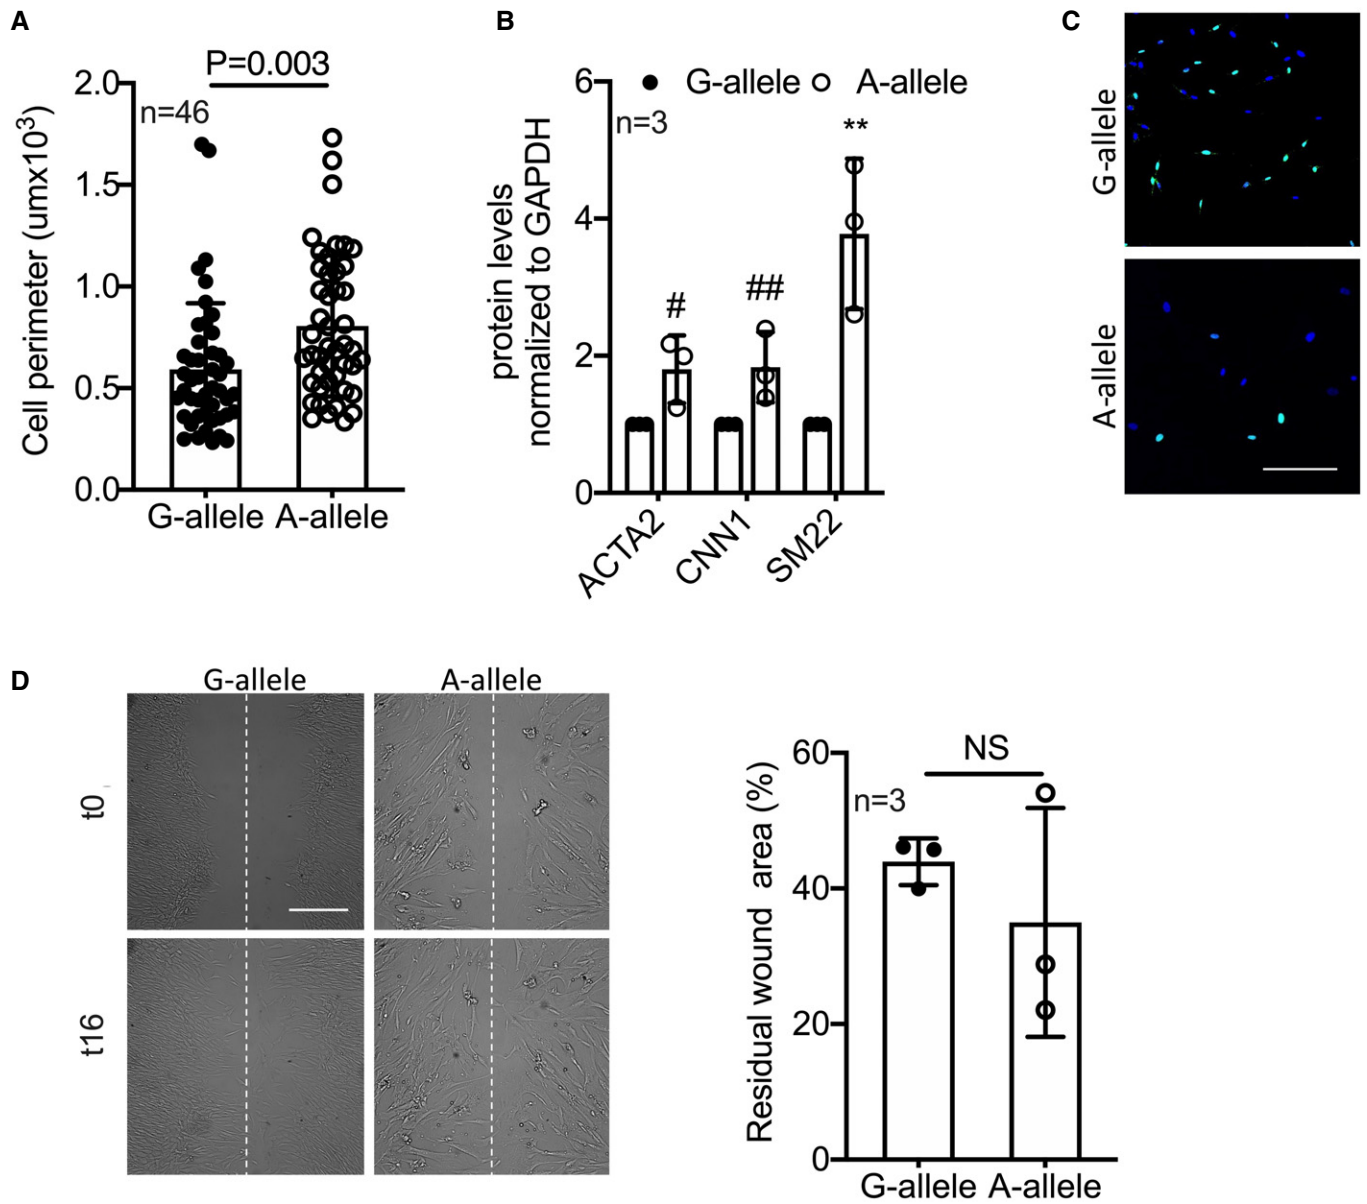

**Figure EV3. HCASMC biological feature analysis.**

A Quantification of the perimeter of HCASMCs carrying the G- and A-allele ( $n = 46$ ).

B Quantification of Western blots in Fig 6G ( $n = 3$ ).

C Representative picture of BrdU incorporating HCASMCs. Scale bar: 50  $\mu\text{m}$ .

D Migration properties measured by scratch ( $n = 3$ ). Scale bar 250  $\mu\text{m}$ .

Data information: Data are shown as mean  $\pm$  standard deviation (SD), and  $n$  indicates the number of biological replicates. To compare means, unpaired Student's  $t$ -test was used considering data from G-allele as control. For B: # $P = 0.0048$ , ## $P = 0.0047$ , \*\* $P = 0.011$ . NS: not statistically significant.

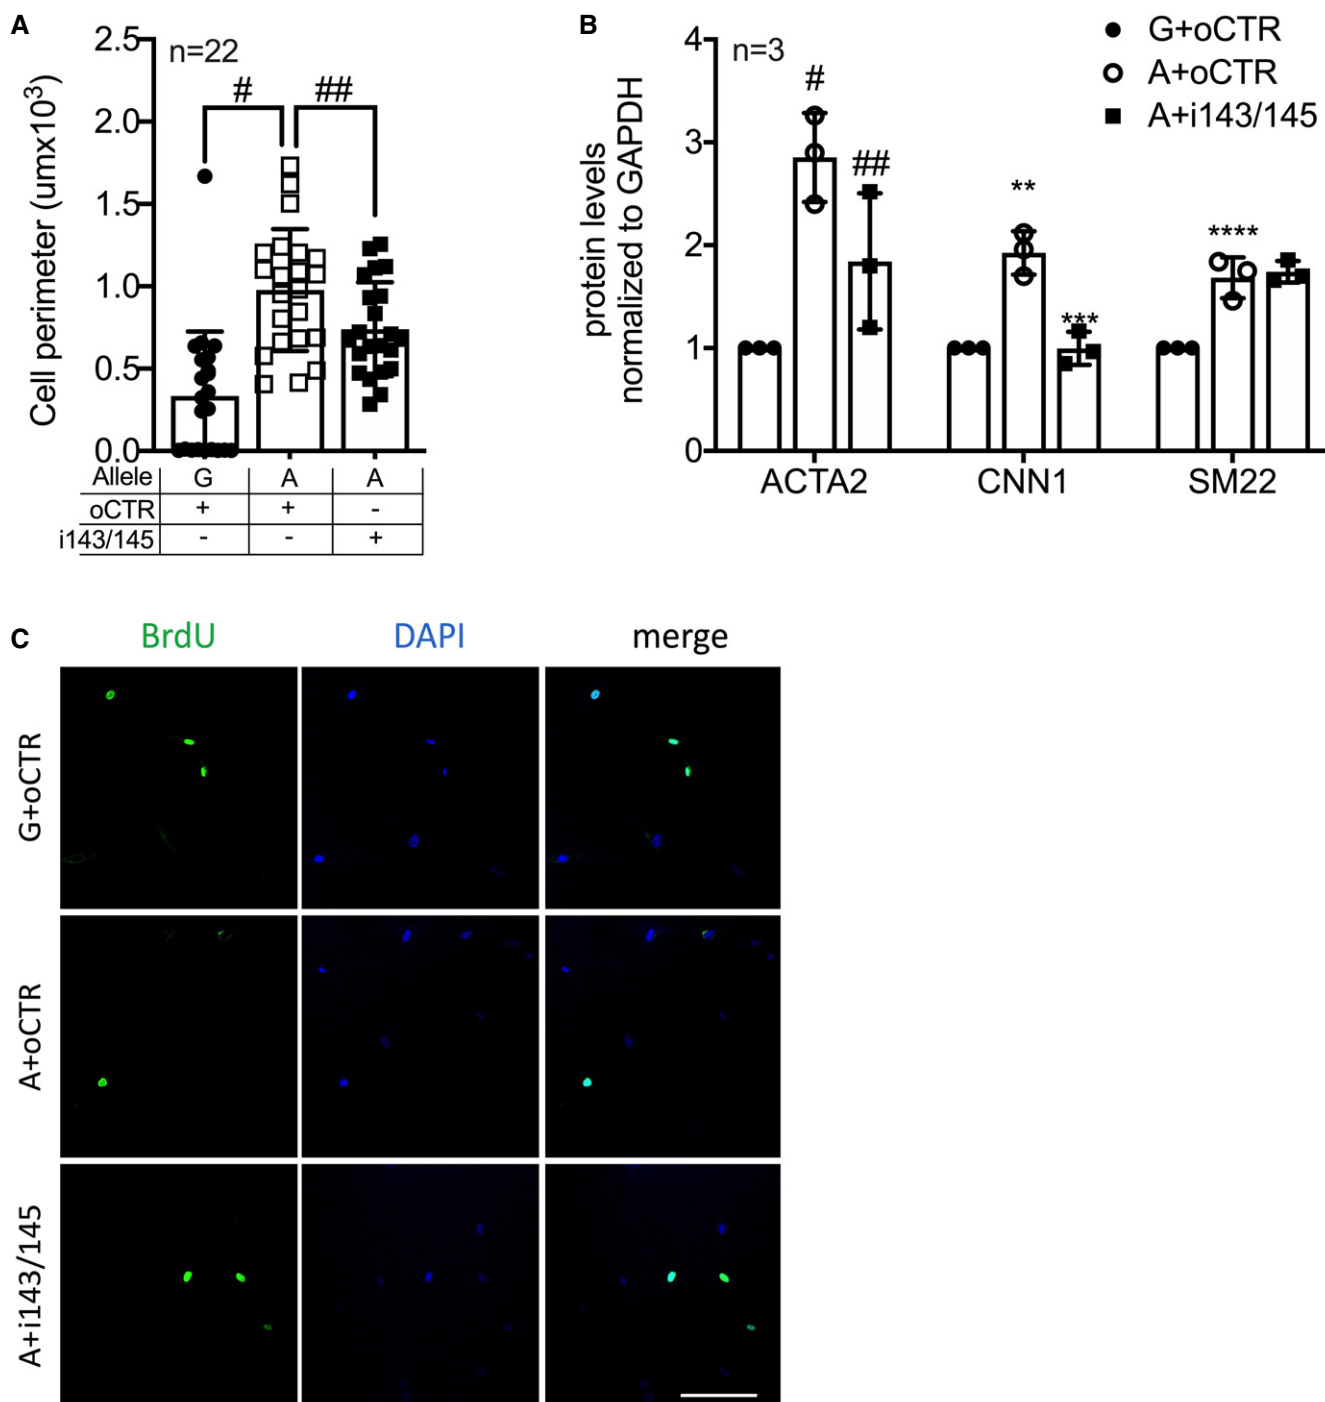

**Figure EV4. miR-143 and miR-145 inhibition affects HCASMCs biological features.**

A Quantification of size of HCASMCs carrying either the G- or A-allele transfected with a control oligonucleotide (oCTR) or after miR-143/145 inhibition (i143/145) ( $n = 22$ ).

B Quantification of Western blots in Fig 7E ( $n = 3$ ).

C Representative picture of BrdU incorporation. Scale bar: 50  $\mu$ m.

Data information: Data are shown as mean  $\pm$  standard deviation (SD), and  $n$  indicates the number of biological replicates. To compare means, one-way ANOVA with Tukey's multiple comparisons test was used. For A: #Adj  $P = 0.0001$ , ##Adj  $P = 0.0475$ ; For B: #Adj  $P = 0.032$ , ##Adj  $P = 0.033$ , \*\*Adj  $P = 0.03$ , \*\*\*Adj  $P = 0.025$ , \*\*\*\*Adj  $P = 0.048$ .

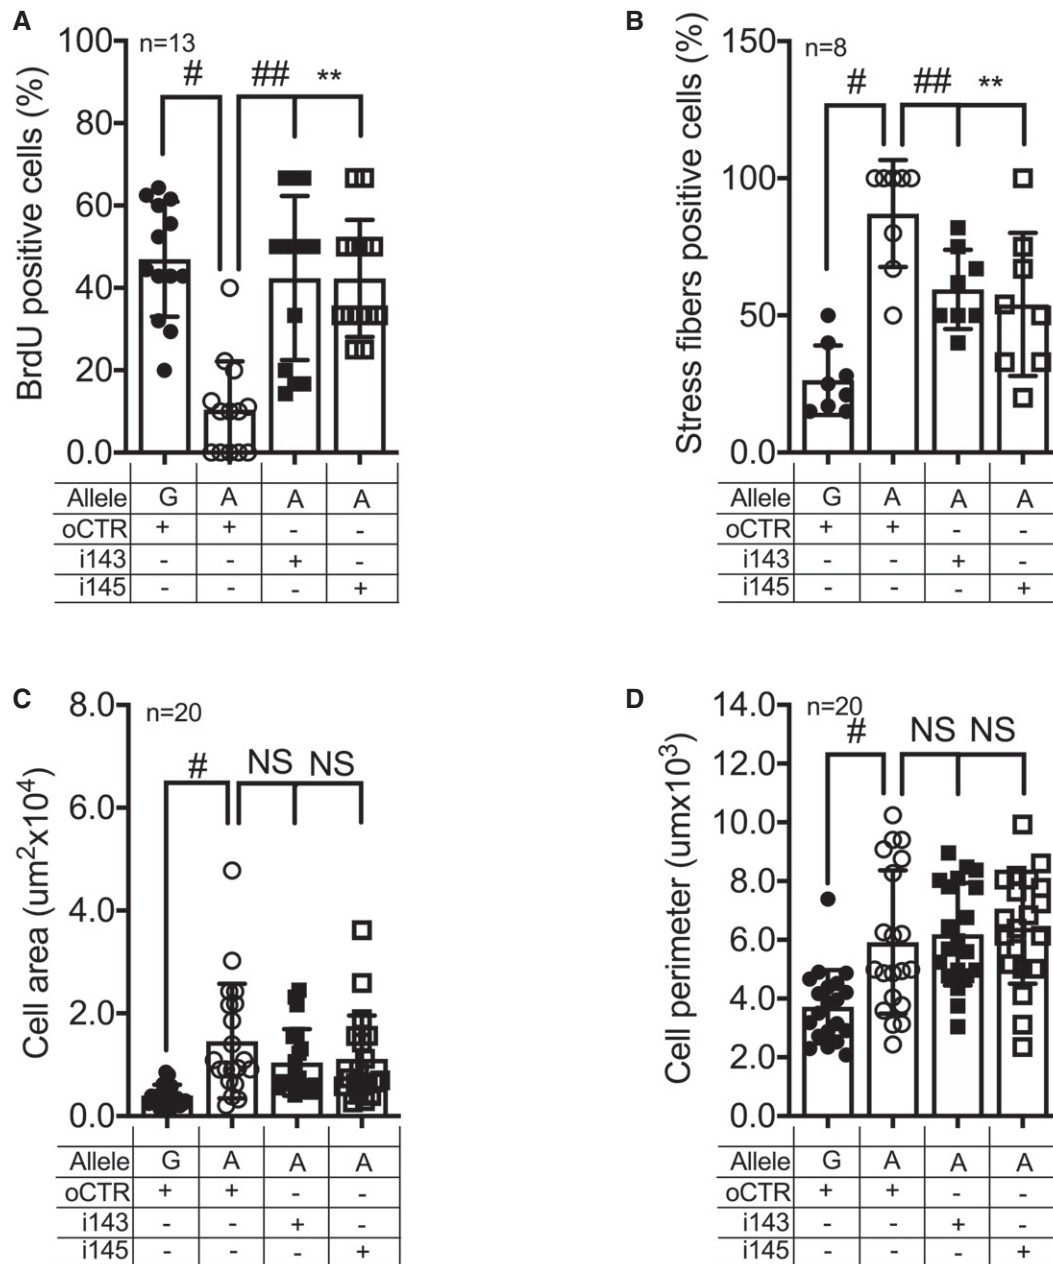

**Figure EV5. miRNA-143 or 145 silencing partially rescues the effects of miR-SNP rs41291957 on HCASMCs.**

- A Proliferation assay measured by BrdU incorporation in the rescue setting ( $n = 13$ ).
- B Quantification of actin signal fluorescence organized in stress fibres in the rescue setting ( $n = 8$ ).
- C Quantification of cellular area of HCASMCs in the rescue setting ( $n = 20$ ).
- D Quantification of cellular perimeter of HCASMCs in the rescue setting ( $n = 20$ ).

Data information: Data are shown as mean  $\pm$  standard deviation (SD), and  $n$  indicates the number of biological replicates. To compare means, one-way ANOVA with Tukey's multiple comparisons test was used. For A: #Adj  $P = 0.0001$ , ##Adj  $P = 0.0026$ , \*\*Adj  $P = 0.0001$ ; For B: #Adj  $P = 0.0001$ , ##Adj  $P = 0.039$ , \*\*Adj  $P = 0.011$ ; For C: # $P = 0.0015$ ; For D: # $P = 0.0026$ . NS: not statistically significant.
