# Supplementary material for: rs41291957 controls miR‐143 and miR‐145 expression and impacts coronary artery disease risk
Source: PubMed Central journal article supplement (PMC8495461; doi:10.15252/emmm.202114060), 2021-09-22
Supplement: EMMM-13-e14060-s009.pdf [file EMMM-13-e14060-s009.pdf]

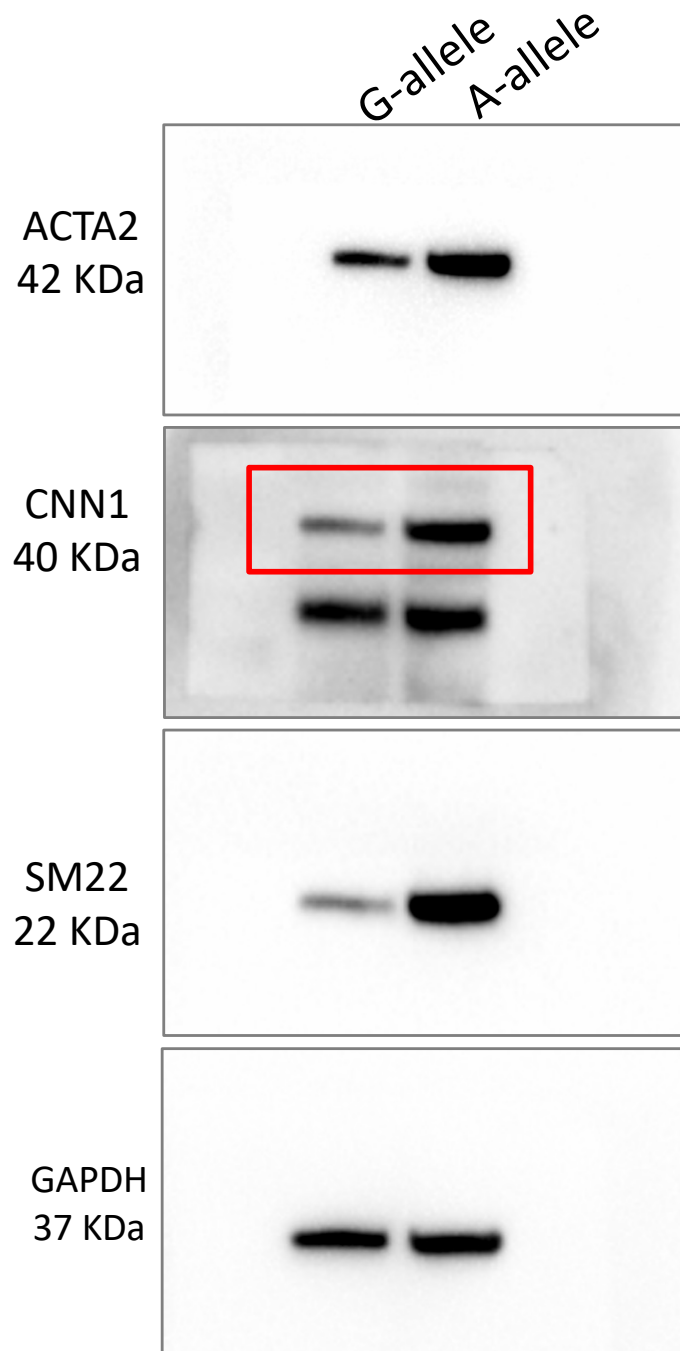

Full unedited blot for Figure 6G  
Acquired with ChemiDoc (BioRad)
