# Supplementary material for: rs41291957 controls miR‐143 and miR‐145 expression and impacts coronary artery disease risk
Source: PubMed Central journal article supplement (PMC8495461; doi:10.15252/emmm.202114060), 2021-09-22
Supplement: EMMM-13-e14060-s011.pdf [file EMMM-13-e14060-s011.pdf]

## **APPENDIX**

### **Table of contents**

|                               |          |
|-------------------------------|----------|
| <b>Appendix Fig S1</b> .....  | <b>2</b> |
| <b>Appendix Fig S2.</b> ..... | <b>3</b> |
| <b>Appendix Fig S3.</b> ..... | <b>4</b> |
| <b>Appendix Fig S4.</b> ..... | <b>5</b> |

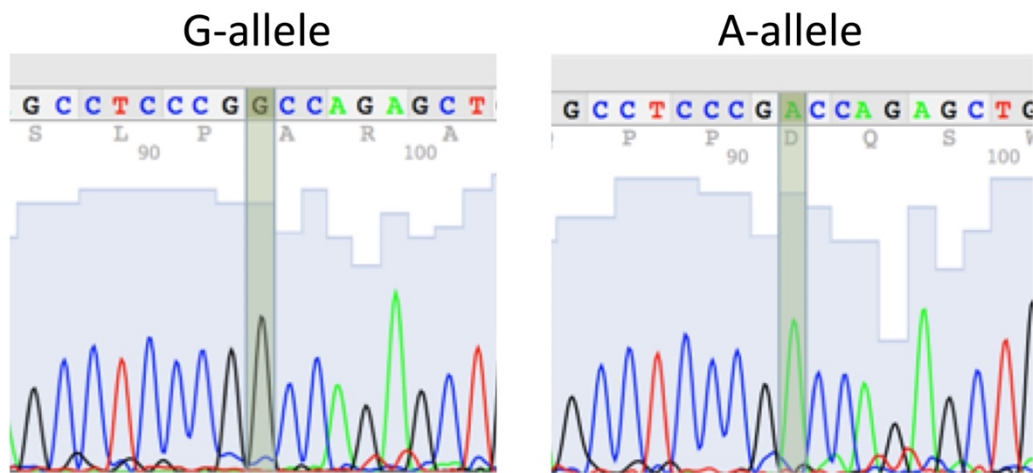

**Appendix Fig S1. Generation of SNP-miR vectors.**

Sanger sequence profiles of the miR-143/145 expression vectors utilized in the experiments shown in Fig 5.

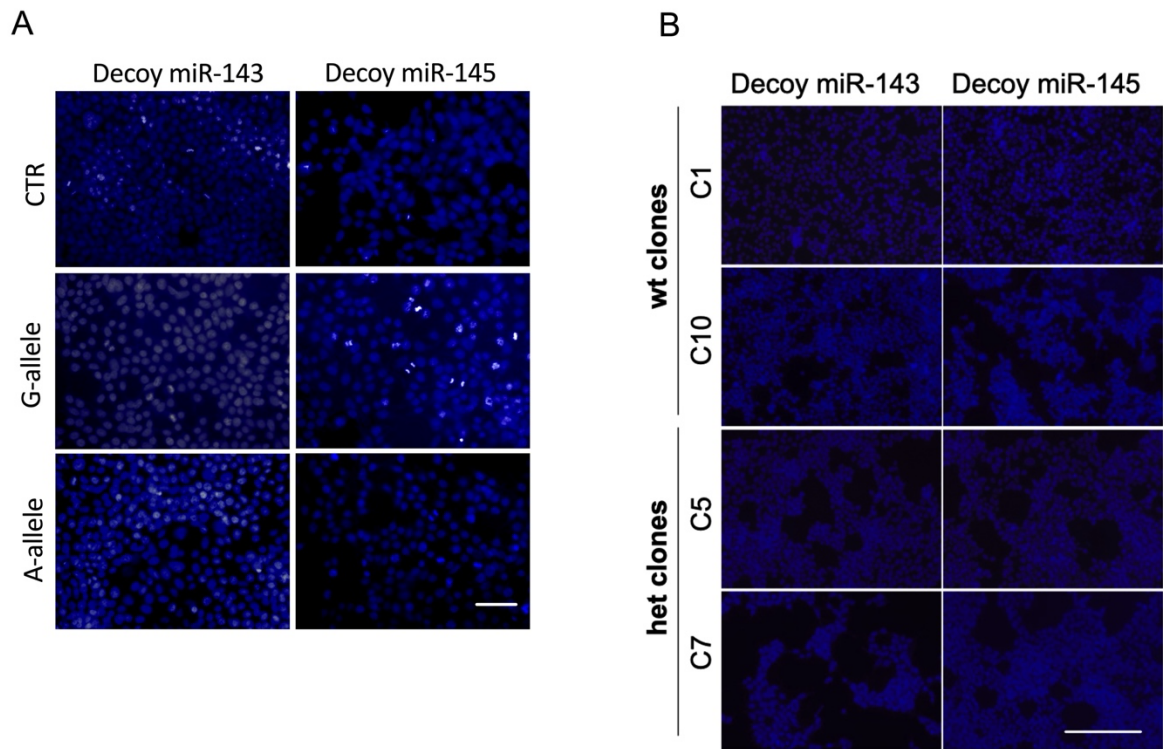

**Appendix Fig S2. DAPI staining related to the images shown in Figures 4B (A) and 5C (B). Scale bars: 50 $\mu$ m.**

A

gaaacaaagaaaagaagagaaaaaagggtcaaggtttggtcctgggtgctcaaatggcagg  
CCAcagacaggaaacacagttgtgaggaattacaacagcctcccGccagagctggag  
*aggtggagcccaggtcccctctaacacccccttctcctggccaggttggagtcccgccacagg*  
ccaccagagcggagca**GCGCAGCGCCCTGTCT**

B

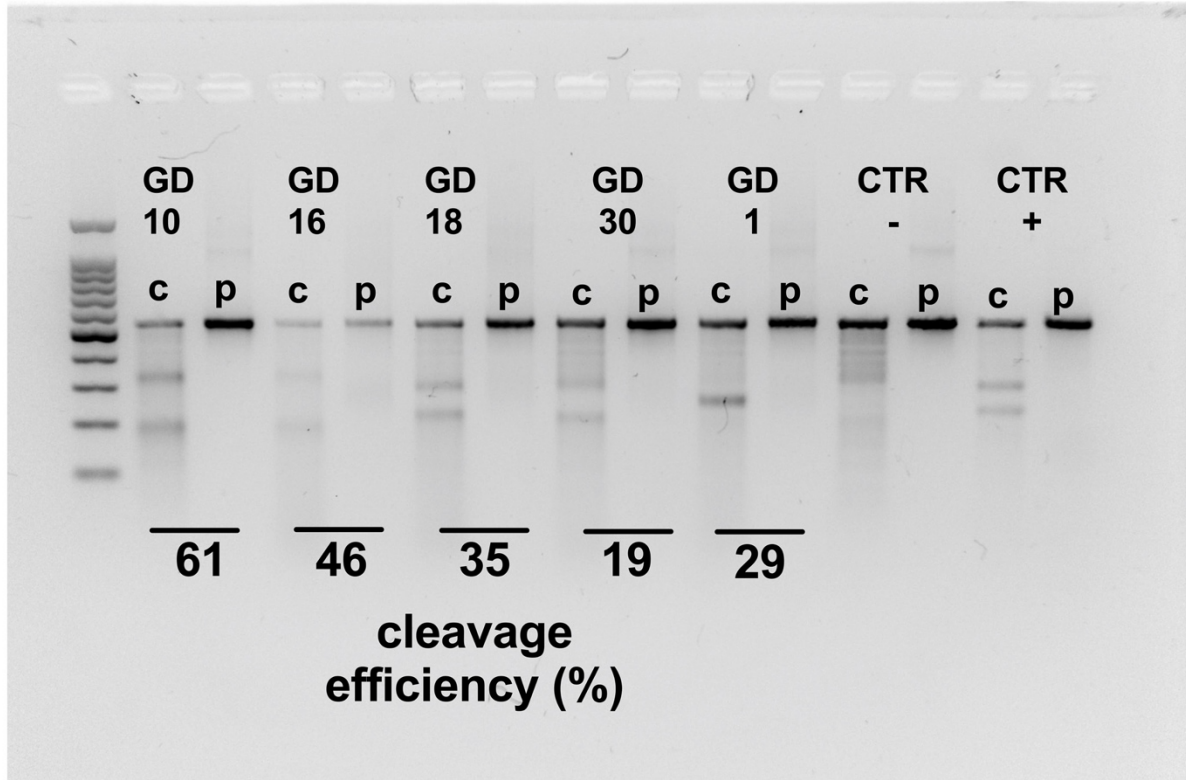

**Appendix Fig S3. Generation of CRISPR/CAS9 clones.**

(A) Wild-type sequence of the genomic locus including *rs41291957*. The genetic variation was introduced using an oligonucleotide for HR carrying the A-allele. The oligonucleotide sequence is underlined and includes an A instead of a G; the PAM sequence of the selected sgRNA is identified in italics but is on the opposite strand (*NGG*); the sequence of the mature miR-143 sequence is shown in bold. (B) Guide efficiency test.

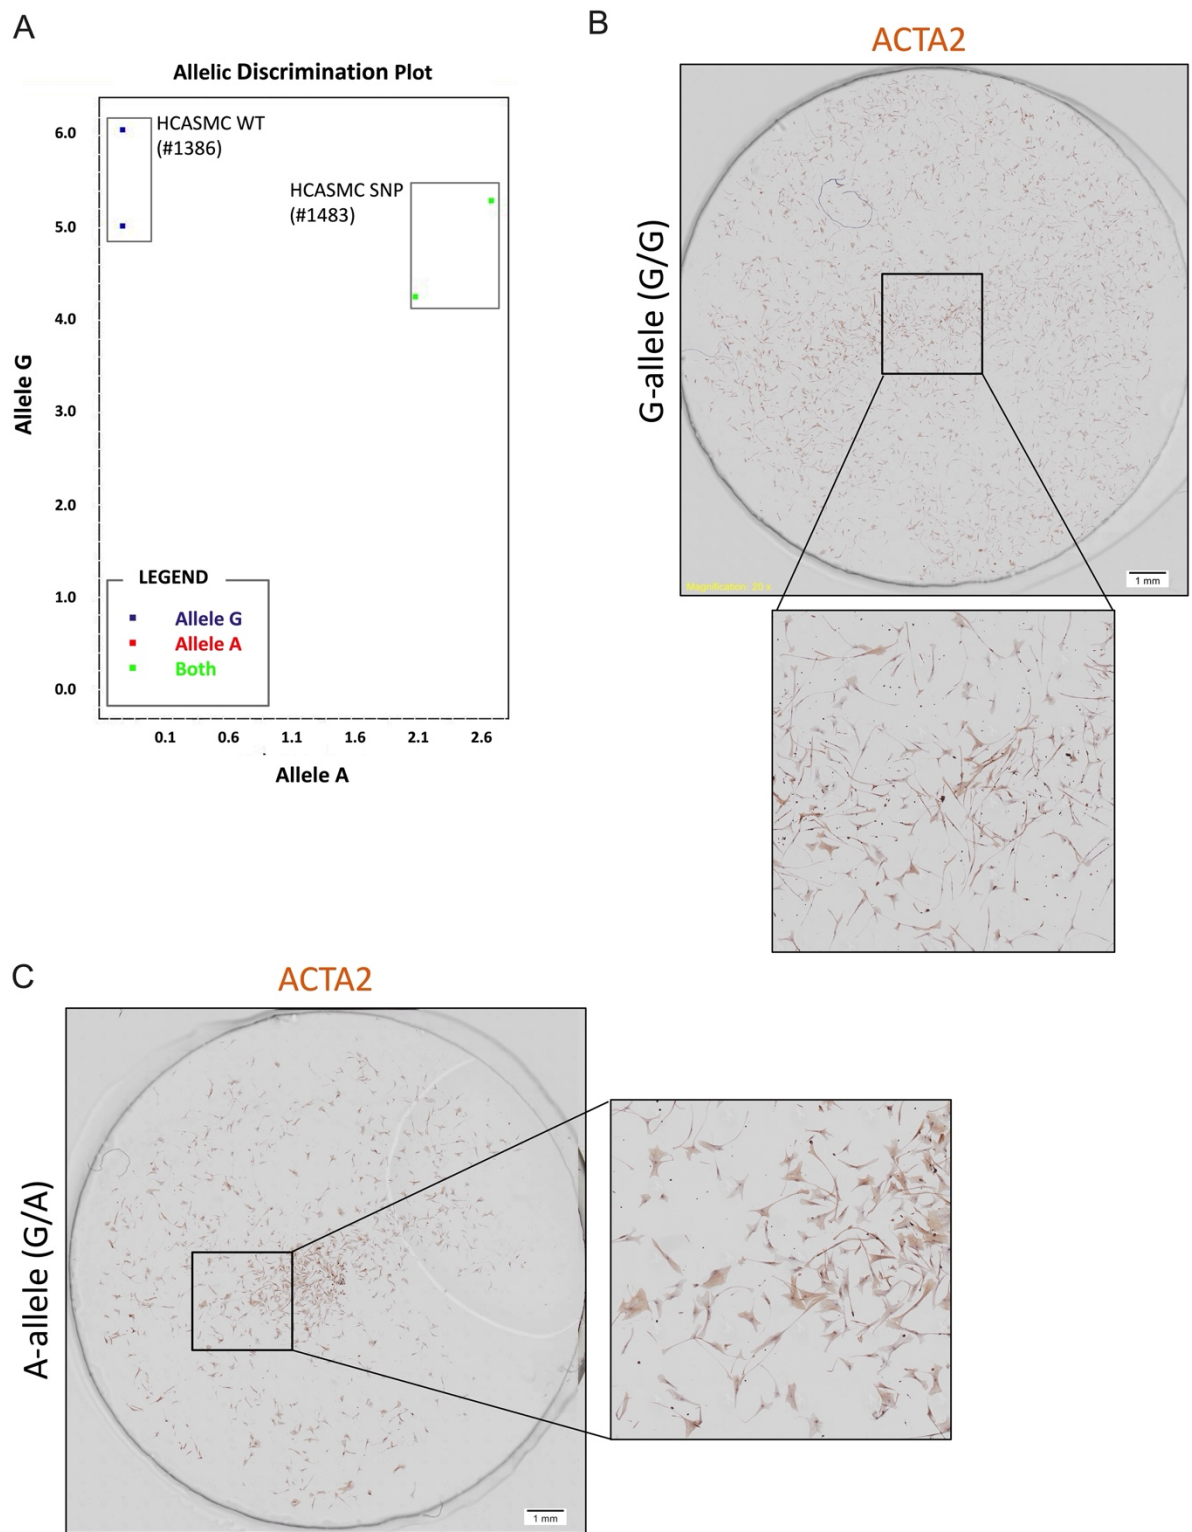

**Appendix Fig S4. Allele discrimination analysis and ACTA2 staining of G- and A-allele HCASMCs.**

(A) HCASMCs were genotyped also by qPCR using taqman probes. (B-C) ACTA2 staining of WT (B) and SNP (C) HCASMCs.
